# Supplementary material
Source: PubMed Central journal article supplement (PMC2034257)

A

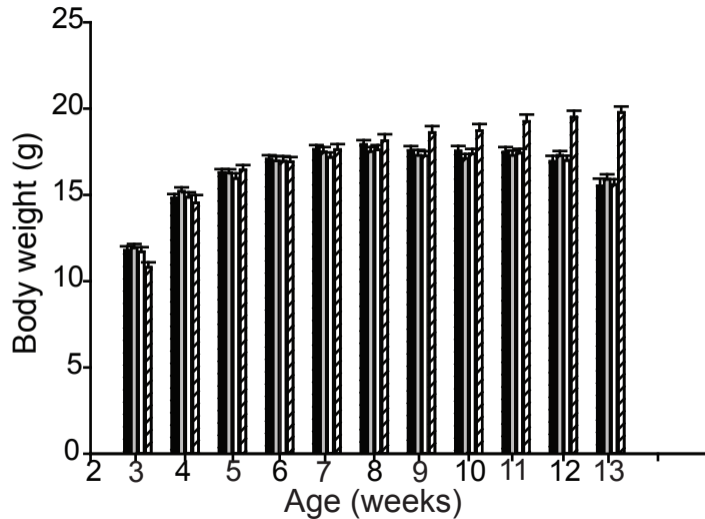

B

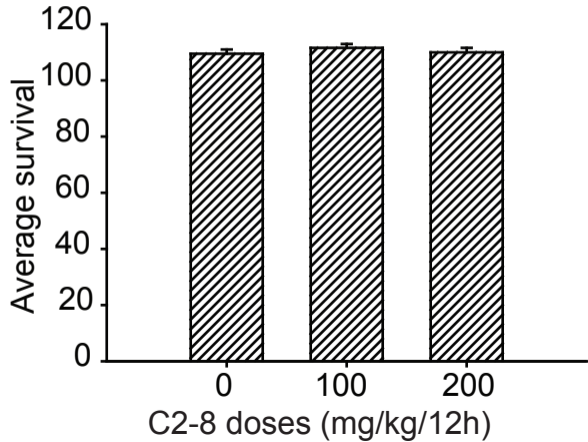

Supplement: pnas_0707842104_1.pdf [file pnas_0707842104_1.pdf]
